# Supplementary material for: π-Face donor properties of N-heterocyclic carbenes
Source: Royal Society of Chemistry journal article supplement (doi:10.1039/b512008j), 2005-01-01

# Supplementary Material (ESI) for Chemical Communications

# This journal is © The Royal Society of Chemistry 2005

## $\pi$ -FACE DONOR PROPERTIES OF N-HETEROCYCLIC CARBENES

MARCUS SÜBNER AND HERBERT PLENIO

ANORGANISCHE CHEMIE IM ZINTL-INSTITUT DES FB CHEMIE, TU DARMSTADT,

PETERSENSTR. 18, 64287 DARMSTADT, GERMANY

E-MAIL: PLENIO@TU-DARMSTADT.DE

# Supplementary Material (ESI) for Chemical Communications

# This journal is © The Royal Society of Chemistry 2005

### Cyclic Voltammetry (EG&G Princeton Applied Research Model 263A potentiostat)

CV measurements were done with a three electrode arrangement. The working electrode was soft glass coated platinum wire (diameter 1 mm). The platinum wire counter electrode was coiled around the glass tube of the working electrode. The pseudoreference electrode was a silver wire. All potentials were referenced against the formal potentials of octamethylferrocene ( $\text{CH}_2\text{Cl}_2$ , -10 mV vs. Ag/AgCl) or ferrocene ( $\text{CH}_2\text{Cl}_2$ , 460 mV vs. Ag/AgCl). All CV measurements were done in dry  $\text{CH}_2\text{Cl}_2$  under an Ar-atmosphere  $\text{NBu}_4\text{PF}_6$  as supporting electrolyte.

### Gas chromatography (Firma Perkin Elmer, Modell Auto System with a CP-SIL<sub>8</sub> AB

column,  $l = 15$  m,  $d_i = 0.25$  mm,  $d_p = 10$  μm) using nitrogen as the carrier gas and FID detection. Quantification of the GC signals was made by referencing with authentic samples.

$^1\text{H-NMR}$  und  $^{13}\text{C-NMR}$ -Spectra: Bruker WM 300 and AC-300 at 300 MHz or 75.5 MHz and a Bruker Avance at 500 MHz or 125.75 MHz,  $^{31}\text{P-NMR}$ -Spectra (Bruker AC 200, 80.96 MHz). All measurements were done at 295 K, referenced to added TMS (0.00 ppm) or internal  $^1\text{H}$  impurities in deuterated solvents.

### $^1\text{H}$ - $^{13}\text{C}$ -NMR data of the imidazolium and imidazolium chlorides

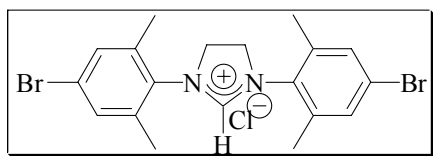

$^1\text{H-NMR}$  (300 MHz,  $[\text{D}_6]$ -DMSO):  $\delta$  2.41 (s, 12H, *ortho-CH*<sub>3</sub>), 4.50 (s, 4H,  $\text{NCH}_2\text{CH}_2\text{N}$ ), 7.56 (s, 4H,  $\text{CH}_{\text{meta}}$ ), 9.25 (s, 1H,  $\text{im-H}^2$ ).  $^{13}\text{C-NMR}$  (75.5 MHz,

$[\text{D}_6]$ -DMSO):  $\delta$  17.1, 50.7, 122.8, 131.3, 132.7, 138.5, 160.3.

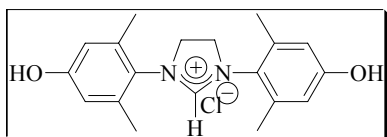

$^1\text{H-NMR}$  (300 MHz,  $[\text{D}_6]$ -DMSO):  $\delta$  2.29 (s, 12H, *ortho-CH*<sub>3</sub>), 4.39 (s, 4H,  $\text{NCH}_2\text{CH}_2\text{N}$ ), 6.67 (s, 4H,  $\text{CH}_{\text{meta}}$ ), 8.94 (s, 1H,  $\text{im-H}^2$ ), 10.1 (bs, 1H, OH).  $^{13}\text{C-NMR}$  (75.5 MHz,

$[\text{D}_6]$ -DMSO):  $\delta$  17.3, 51.0, 115.2, 124.6, 136.8, 137.4 158.3.

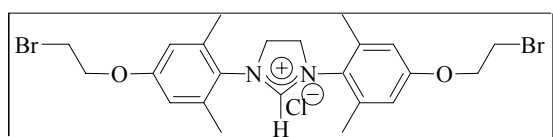

$^1\text{H-NMR}$  (500 MHz,  $\text{CD}_3\text{CN}$ ):  $\delta$  2.30 (s, 12H, *ortho-CH*<sub>3</sub>), 3.64 (t,  $J = 5.3$  Hz, 4H,  $\text{CH}_2\text{Br}$ ), 4.25 (t,  $J = 5.3$  Hz, 4H,  $\text{CH}_2\text{O}$ ), 4.32 (s, 4H,

$\text{NCH}_2\text{CH}_2\text{N}$ ), 6.72 (s, 4H,  $\text{CH}_{\text{meta}}$ ), 8.56 (s, 1H,  $\text{im-H}^2$ ).  $^{13}\text{C-NMR}$  (125 MHz,  $\text{CD}_3\text{CN}$ ):  $\delta$  17.0, 29.8, 51.1, 67.8, 114.3, 126.0, 137.4, 158.6, 160.0.

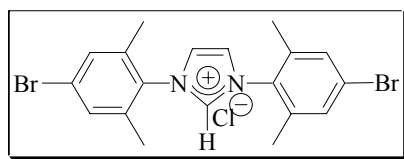

$^1\text{H-NMR}$  (300 MHz,  $[\text{D}_6]$ -DMSO):  $\delta$  2.16 (s, 12H, *ortho-CH*<sub>3</sub>), 7.69 (s, 4H, *CH*<sub>meta</sub>), 8.34 (s, 2H, im-*H*<sup>4,5</sup>), 9.79 (s, 1H, im-*H*<sup>2</sup>).  $^{13}\text{C-NMR}$  (75.5 MHz,  $[\text{D}_6]$ -DMSO):  $\delta$  16.7, 123.8, 124.6, 131.4, 132.7, 137.3, 138.6.

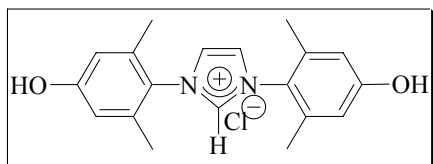

$^1\text{H-NMR}$  (300 MHz,  $[\text{D}_6]$ -DMSO):  $\delta$  2.03 (s, 12H, *ortho-CH*<sub>3</sub>), 6.75 (s, 4H, *CH*<sub>meta</sub>), 8.19 (s, 2H, im-*H*<sup>4,5</sup>), 9.58 (s, 1H, im-*H*<sup>2</sup>), 10.21 (bs, 1H, OH).  $^{13}\text{C-NMR}$  (75.5 MHz,  $[\text{D}_6]$ -DMSO):  $\delta$  18.3, 114.2, 128.6, 137.9, 141.8, 154.2 162.8.

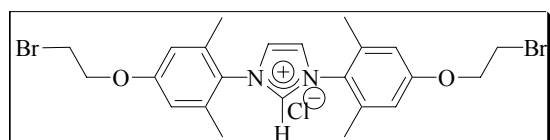

$^1\text{H-NMR}$  (300 MHz,  $\text{CDCl}_3$ ):  $\delta$  2.09 (s, 12H, *ortho-CH*<sub>3</sub>), 3.58 (t,  $J = 6.0$  Hz, 4H, *CH*<sub>2</sub>Br), 4.23 (t,  $J = 6.0$  Hz, 4H, *CH*<sub>2</sub>O), 6.66 (s, 4H, *CH*<sub>meta</sub>), 7.58 (s, 2H, *CH=N*), 10.95 (s, 1H, im-*H*<sup>2</sup>).  $^{13}\text{C-NMR}$  (75 MHz,  $\text{CDCl}_3$ ):  $\delta$  18.2, 29.0, 68.1, 115.1, 124.7, 126.6, 136.3, 140.5, 159.4.

### Spectroscopic data of the Grubbs-II-complexes

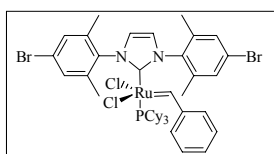

$^1\text{H-NMR}$  (200 MHz,  $\text{C}_6\text{D}_6$ ):  $\delta$  1.12-2.44 (m, 45H), 5.95 (s, 2H, *NCHCHN*), 7.01-7.36 (m, 9H), 19.83 (s, 1H, Ru*CHAr*).  $^{31}\text{P-NMR}$  (81.0 MHz,  $\text{C}_6\text{D}_6$ ):  $\delta$  32.0.

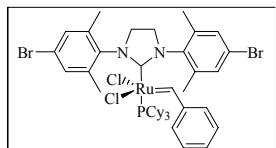

$^1\text{H-NMR}$  (200 MHz,  $\text{C}_6\text{D}_6$ ):  $\delta$  1.11-3.09 (m, 49H) 7.05-7.36 (s, 9H), 19.54 (s, 1H, Ru*CHAr*).  $^{31}\text{P-NMR}$  (81.0 MHz,  $\text{C}_6\text{D}_6$ ):  $\delta$  30.2.

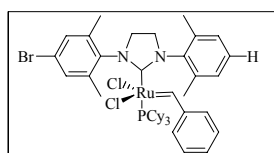

$^1\text{H-NMR}$  (200 MHz,  $\text{C}_6\text{D}_6$ ):  $\delta$  1.08-3.30 (m, 49H) 7.00-7.15 (m, 10H), 19.68 (s, 1H, Ru*CHAr*).  $^{31}\text{P-NMR}$  (81.0 MHz,  $\text{C}_6\text{D}_6$ ):  $\delta$  29.2.

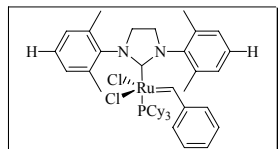

$^1\text{H-NMR}$  (200 MHz,  $\text{C}_6\text{D}_6$ ):  $\delta$  1.08-3.30 (m, 49H) 7.00-7.15 (m, 11H), 19.66 (s, 1H, RuCHAR).  $^{31}\text{P-NMR}$  (81.0 MHz,  $\text{C}_6\text{D}_6$ ):  $\delta$  29.1.

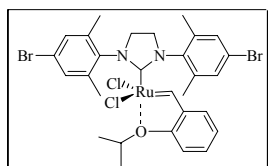

$^1\text{H-NMR}$  (500 MHz,  $\text{C}_6\text{D}_6$ ):  $\delta$  1.27 (d, 6H,  $J = 6.1$  Hz,  $(\text{CH}_3)_2\text{CHOAr}$ ), 2.32 (bs, 12H, *ortho-CH*<sub>3</sub>), 3.21 (s, 4H, NCH<sub>2</sub>CH<sub>2</sub>N), 4.42 (sept., 1H,  $J = 6.1$  Hz,  $(\text{CH}_3)_2\text{CHOAr}$ ), 6.23 (d, 1H,  $J = 8.3$  Hz, *aromat.-CH*), 6.58 (t, 1H,  $J = 7.4$  Hz, *aromat.-CH*), 7.02 (m, 1H, *aromat.-CH*), 7.19 (d, 1H,  $J = 7.6$  Hz, *aromat.-CH*), 7.25 (s, 4H,  $\text{CH}_{meta}$ ), 16.47 (s, 1H, RuCHAR).

$^{13}\text{C-NMR}$  (125.75 MHz,  $\text{C}_6\text{D}_6$ ):  $\delta$  18.1, 19.9, 49.5, 74.1, 111.9, 121.0, 121.2, 128.2, 130.5, 140.8, 144.3, 151.4, 212.7, 295.0.

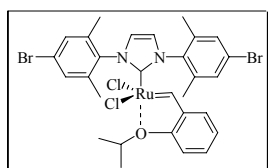

$^1\text{H-NMR}$  (500 MHz,  $\text{C}_6\text{D}_6$ ):  $\delta$  1.34 (d, 6H,  $J = 6.1$  Hz,  $(\text{CH}_3)_2\text{CHOAr}$ ), 2.15 (s, 12H, *ortho-CH*<sub>3</sub>), 4.43 (sept., 1H,  $J = 6.2$  Hz,  $(\text{CH}_3)_2\text{CHOAr}$ ), 6.05 (s, 2H, NCHCHN) 6.25 (d, 1H,  $J = 8.3$  Hz, *aromat.-CH*), 6.63 (d, 1H,  $J = 7.5$  Hz, *aromat.-CH*), 7.05 (m, 1H, *aromat.-CH*), 7.24 (s, 4H,  $\text{CH}_{meta}$ ), 7.28 (d, 1H,  $J = 7.6$  Hz, *aromat.-CH*), 16.60 (s, 1H, RuCHAR).

$^{13}\text{C-NMR}$  (125.75 MHz,  $\text{C}_6\text{D}_6$ ):  $\delta$  19.2, 21.4, 75.6, 113.3, 122.1, 122.5, 123.7, 124.2, 130.3, 131.6, 137.8, 141.1, 145.9, 152.9, 179.2, 287.5.

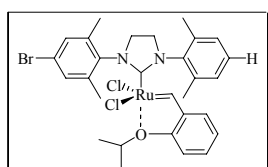

$^1\text{H-NMR}$  (500 MHz,  $\text{C}_6\text{D}_6$ ):  $\delta$  1.28 (d, 6H,  $J = 6.1$  Hz,  $(\text{CH}_3)_2\text{CHOAr}$ ), 2.41 (bs, 6H, *ortho-CH*<sub>3</sub>), 2.45 (bs, 6H, *ortho-CH*<sub>3</sub>), 3.26 (m, 2H, NCH<sub>2</sub>), 3.33 (m, 2H, CH<sub>2</sub>N), 4.43 (sept., 1H,  $J = 6.1$  Hz,  $(\text{CH}_3)_2\text{CHOAr}$ ), 6.26 (d, 1H,  $J = 8.5$  Hz, *aromat.-CH*), 6.58 (t, 1H,  $J = 7.6$  Hz, *aromat.-CH*), 7.04-7.15 (m, 6H,  $\text{CH}_{meta}$ ,  $\text{CH}_{para}$ , *aromat.-CH*), 7.19 (m, 1H, *aromat.-CH*), 16.48 (s, 1H, RuCHAR).

$^{13}\text{C-NMR}$  (125.75 MHz,  $\text{C}_6\text{D}_6$ ):  $\delta$  19.3, 20.0, 21.3, 50.7, 51.35, 72.3, 113.2, 122.2, 122.5, 123.0, 129.24, 131.77, 139.4, 142.6, 145.7, 152.7, 213.5, 291.7.

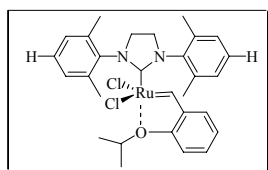

$^1\text{H-NMR}$  (500 MHz,  $\text{C}_6\text{D}_6$ ):  $\delta$  1.30 (d, 6H,  $J = 6.0$  Hz,  $(\text{CH}_3)_2\text{CHOAr}$ ), 2.56 (bs, 12H, *ortho-CH*<sub>3</sub>), 3.39 (s, 4H,  $\text{NCH}_2\text{CH}_2\text{N}$ ), 4.52 (sept., 1H,  $J = 6.2$  Hz,  $(\text{CH}_3)_2\text{CHOAr}$ ), 6.31 (d, 1H,  $J = 7.9$  Hz, *aromat.-CH*), 6.60 (t, 1H,  $J = 7.4$  Hz, *aromat.-CH*), 7.06-7.10 (m, 7H,  $\text{CH}_{\text{meta}}$ ,  $\text{CH}_{\text{para}}$ , *aromat.-CH*), 7.17 (d, 1H,  $J = 8.0$  Hz, *aromat.-CH*), 16.50 (s, 1H,  $\text{RuCHAr}$ ).

$^{13}\text{C-NMR}$  (125.75 MHz,  $\text{C}_6\text{D}_6$ ):  $\delta$  19.7, 21.4, 51.2, 73.1, 113.2, 122.1, 122.5, 129.0, 139.5, 145.7, 152.7, 213.0, 291.8.

### Cyclic Voltammograms of several Olefin Metathesis Catalysts

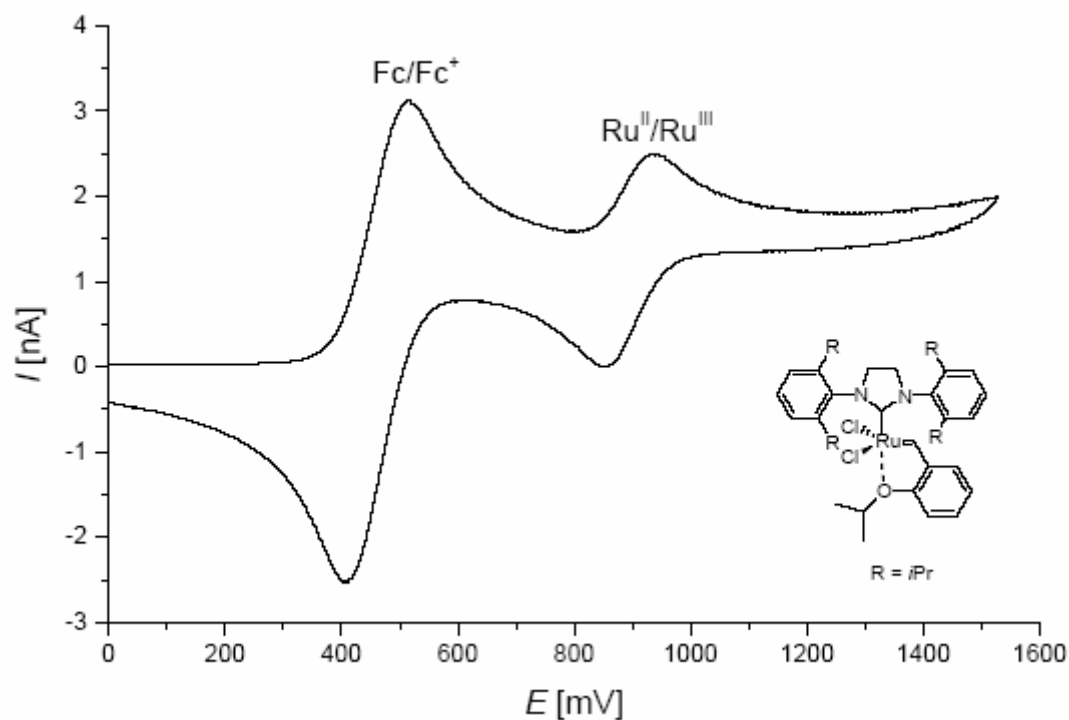

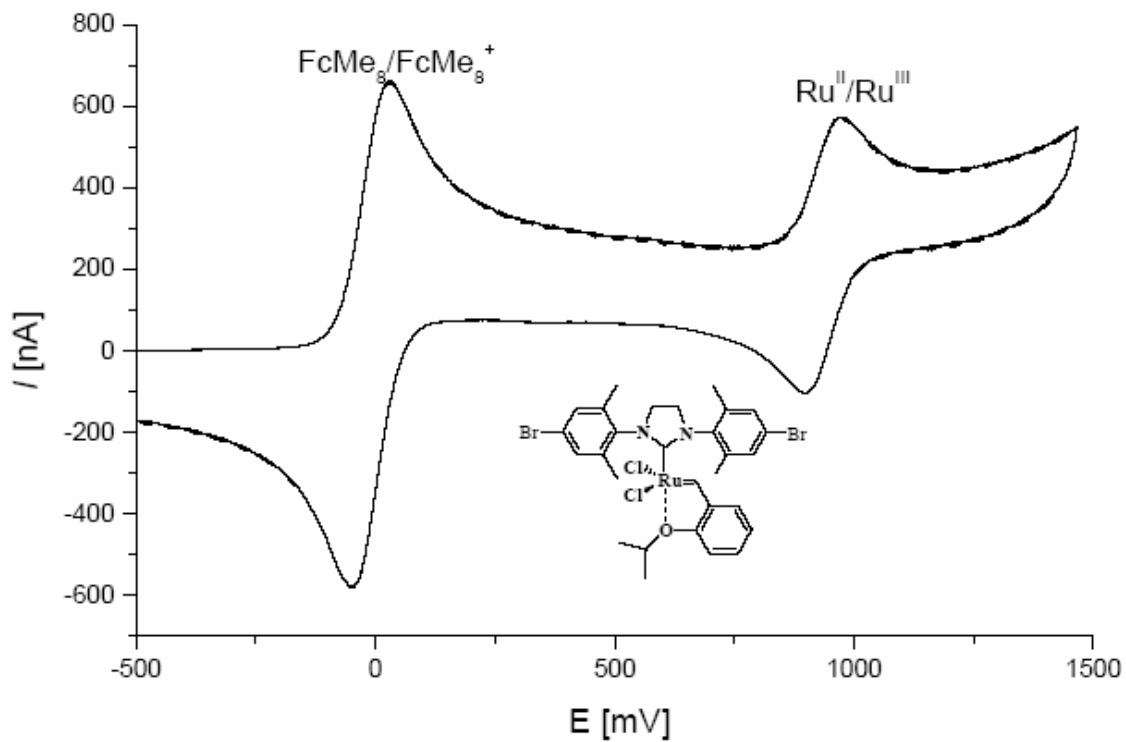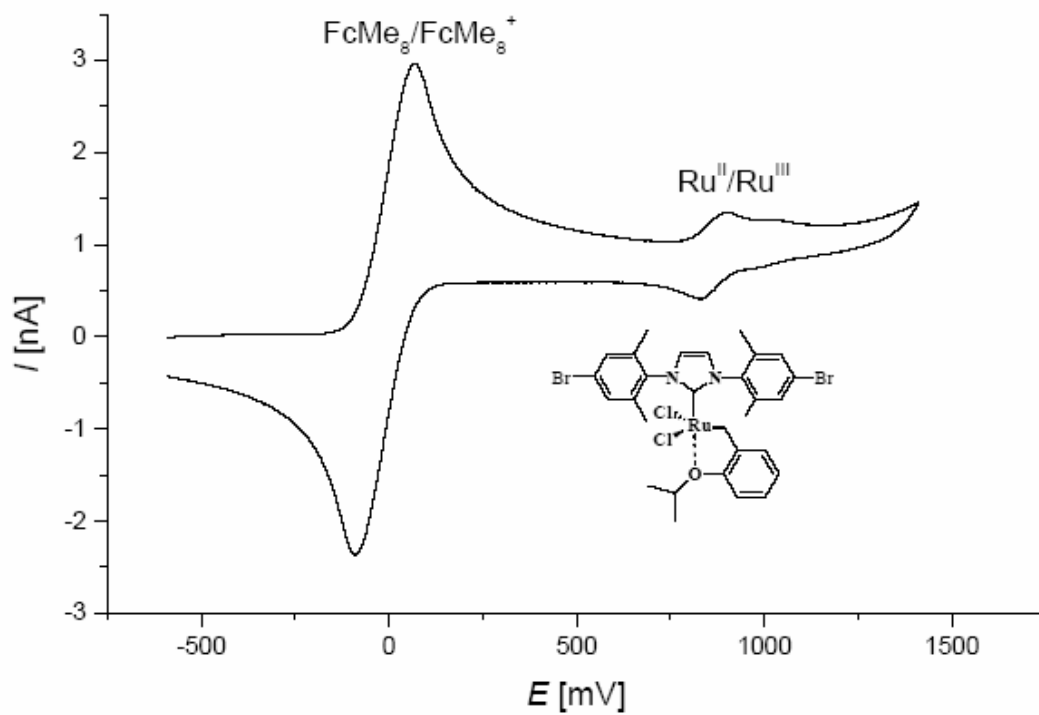

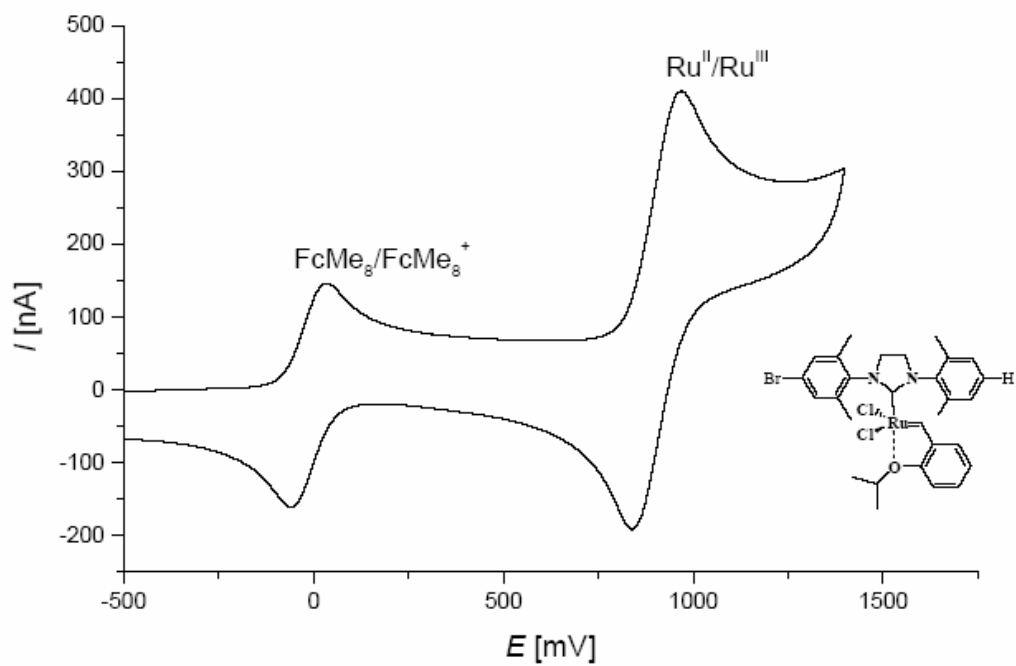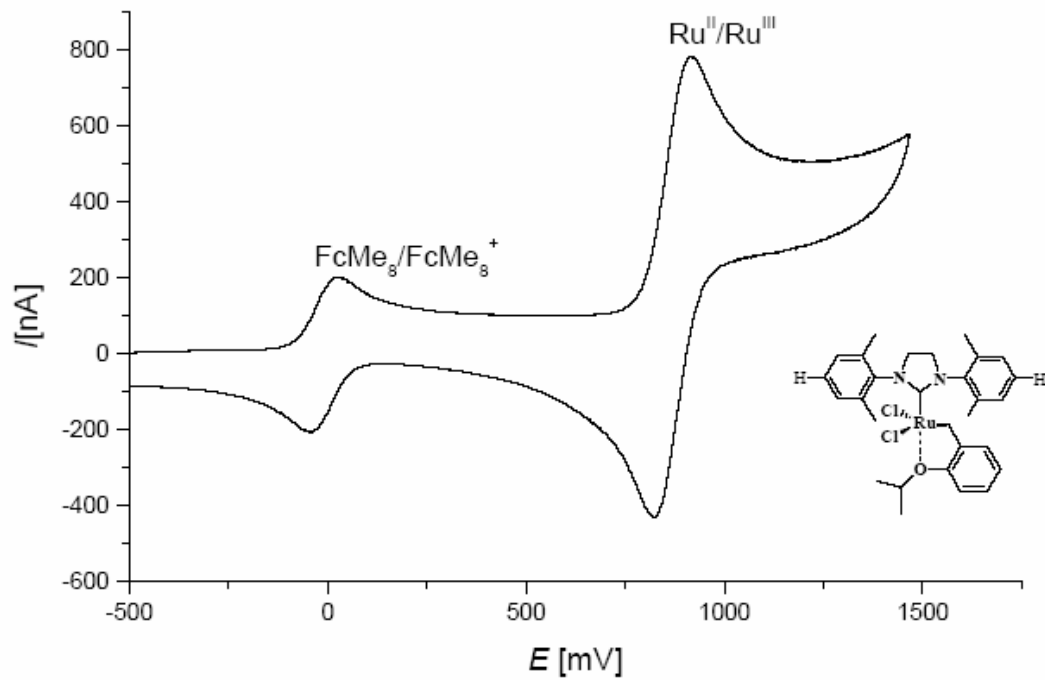

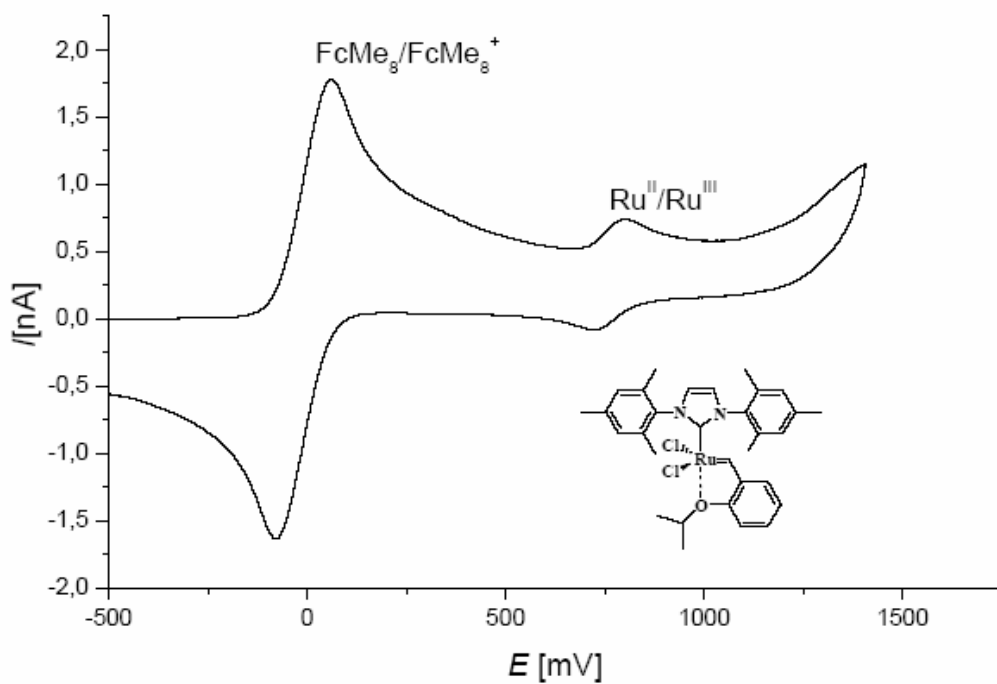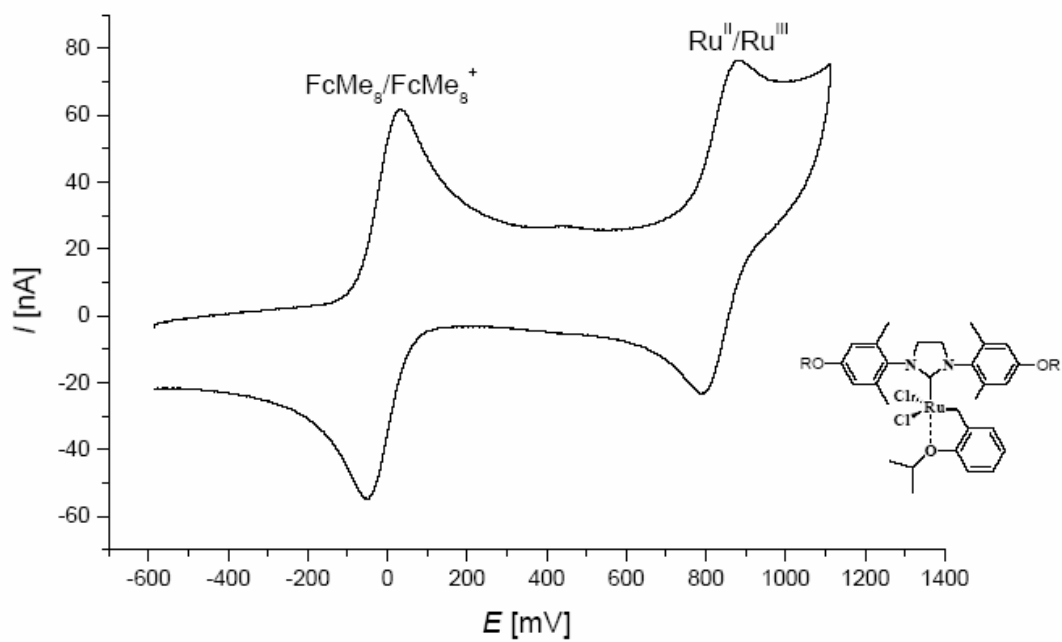



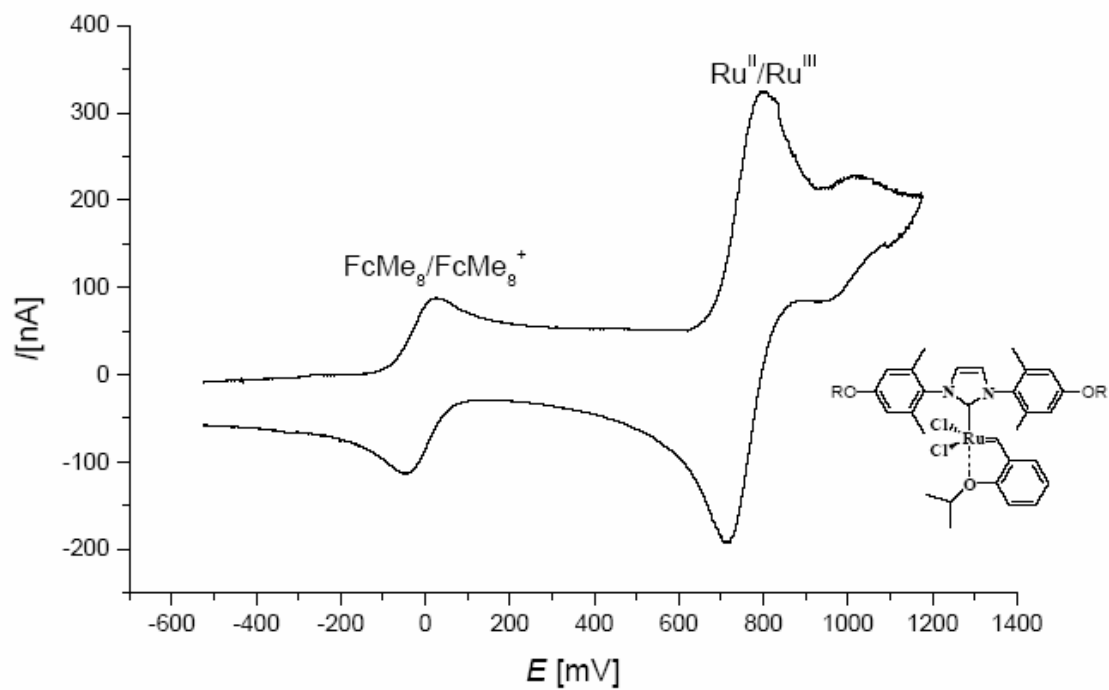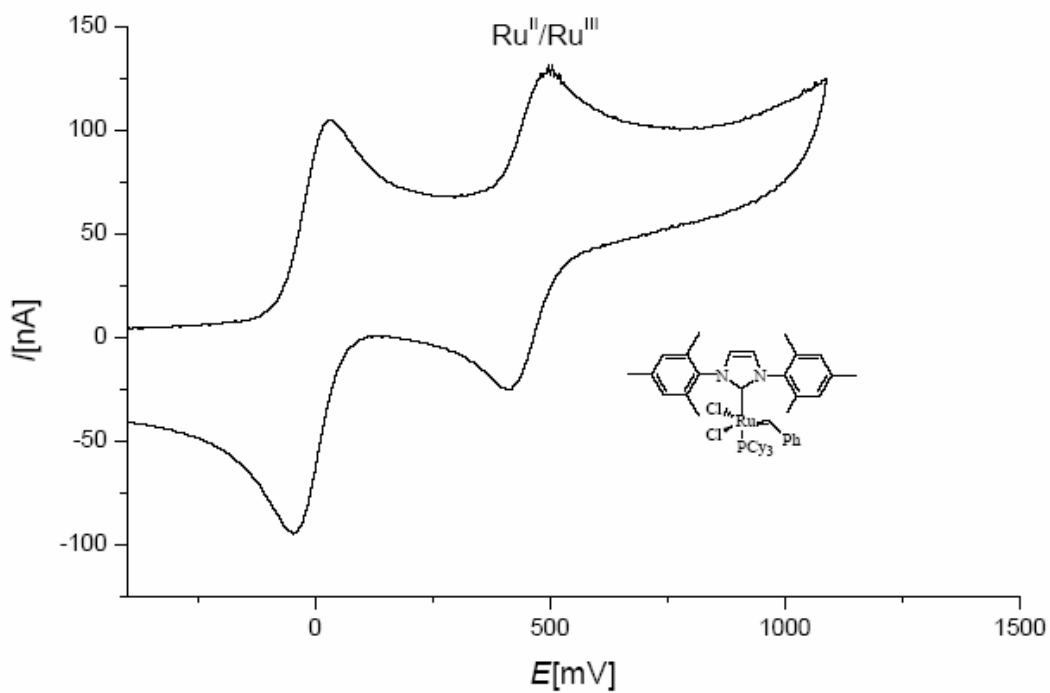

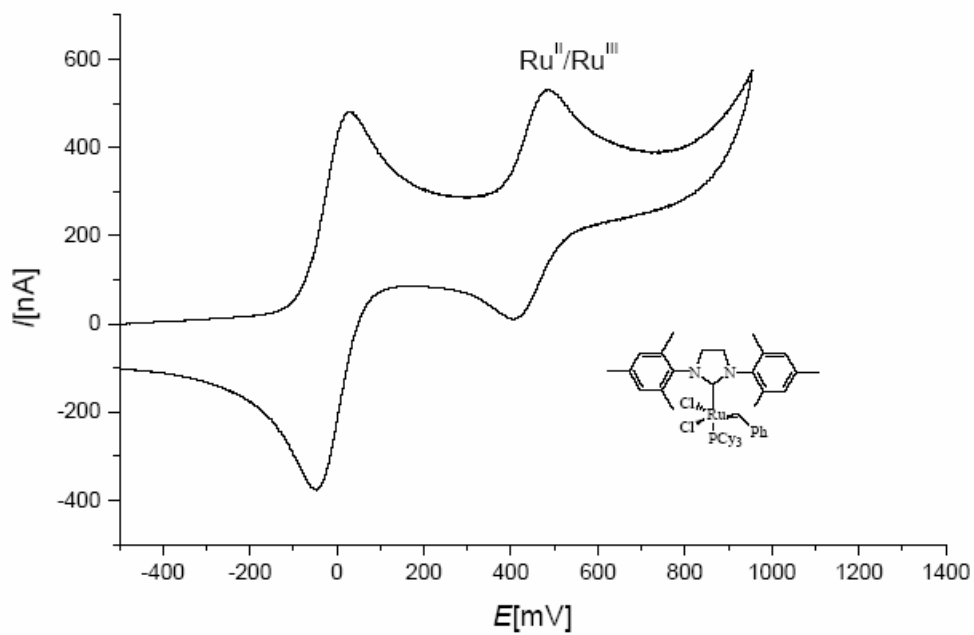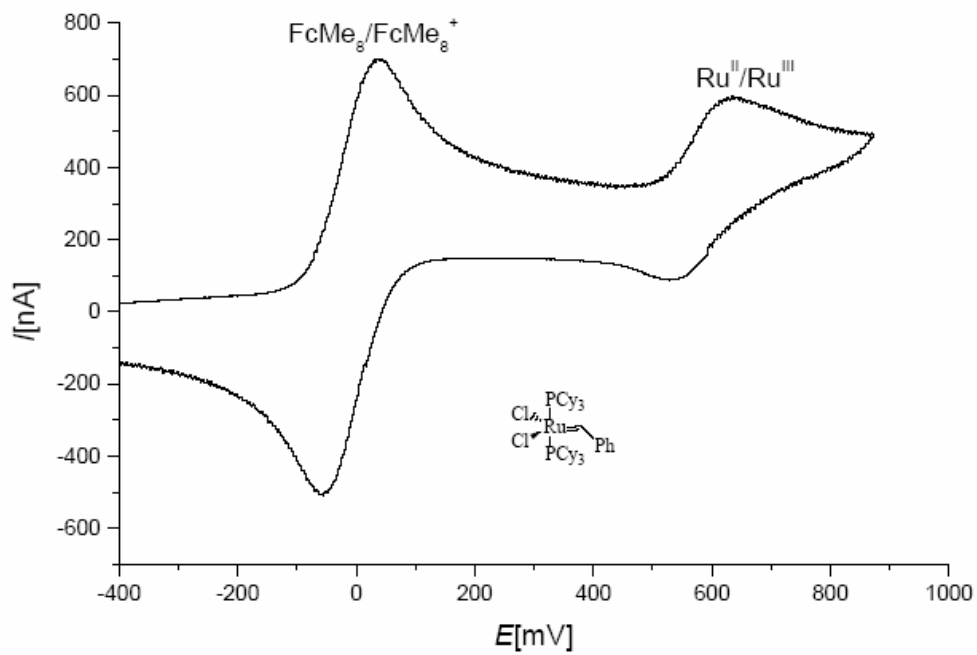

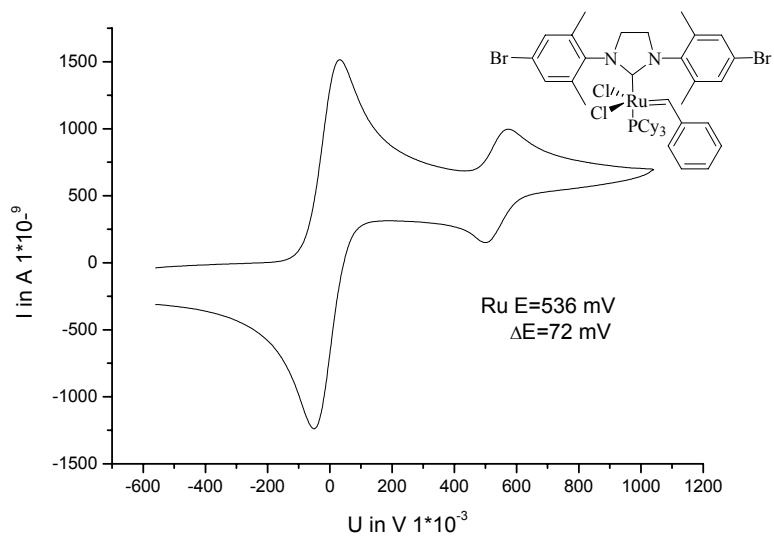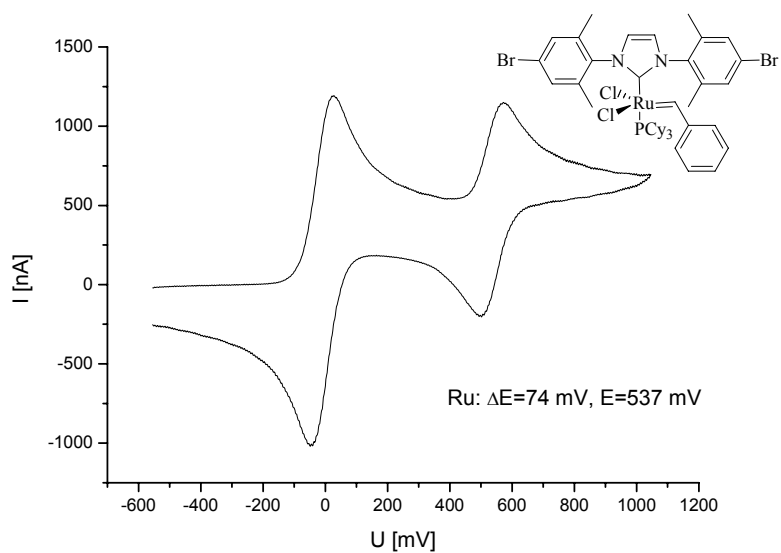

Supplement: b512008j.pdf [file b512008j.pdf]
